# Supplementary material
Source: Springer Nature journal article supplement (https://www.springermedizin.de/resource/supplementary/13643_2014_343_MOESM3_ESM.pdf/9681954)
Supplement: MOESM3 [file 9681954]

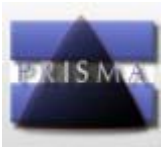

# PRISMA 2009 Flow Diagram

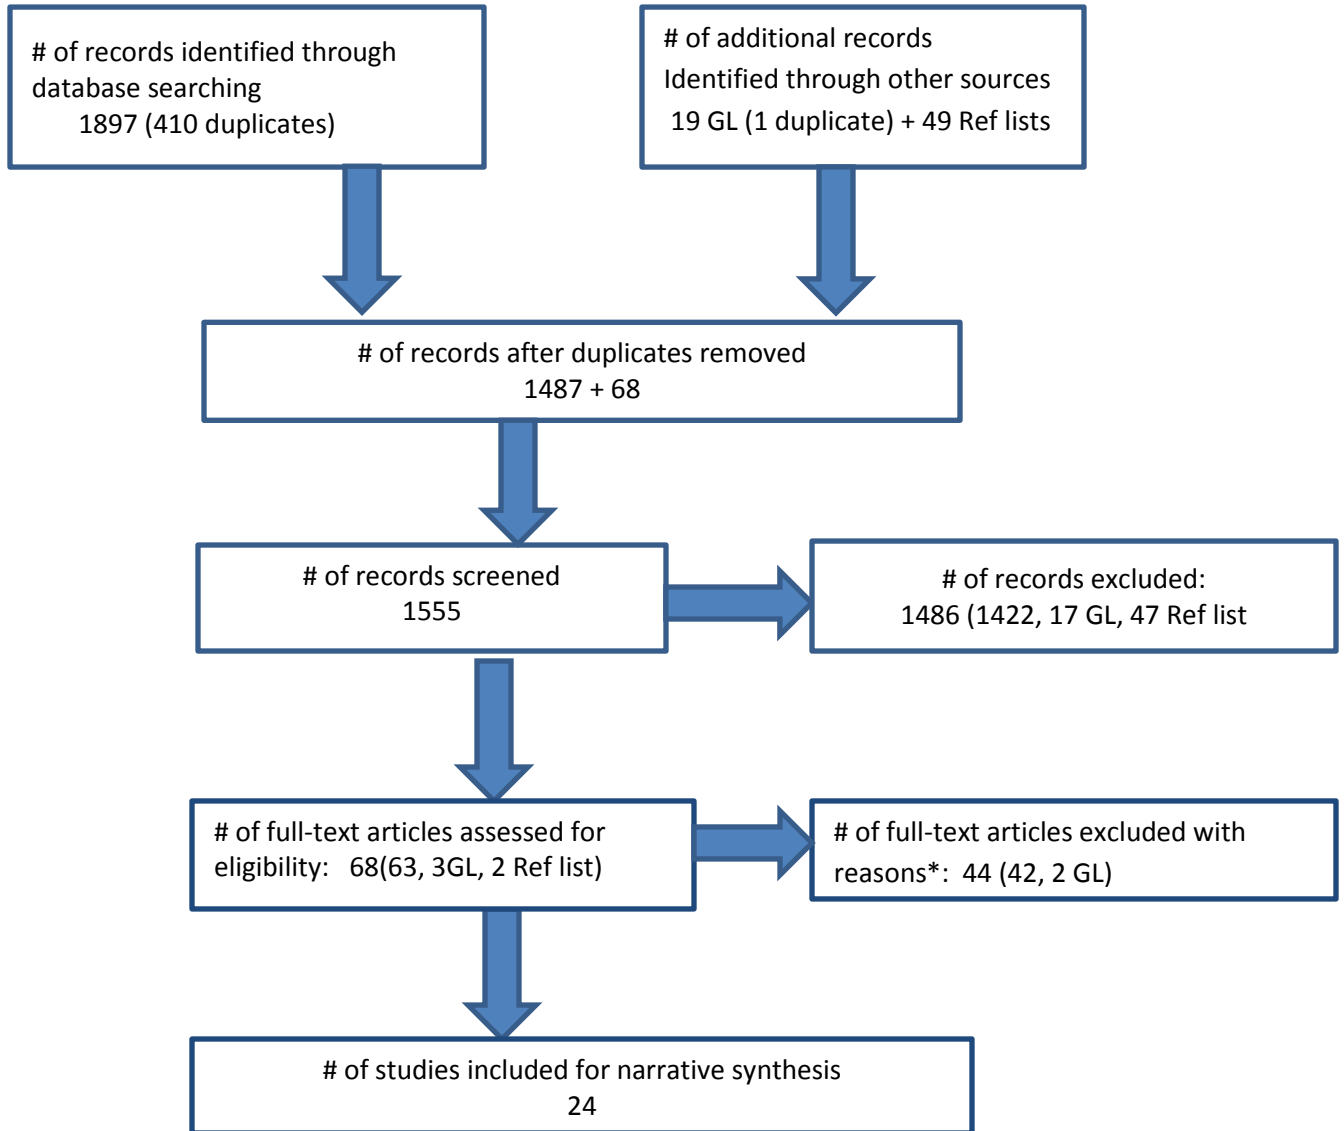

## \* Reasons for Exclusion for Database articles

| Ref id and 1 <sup>st</sup> Author | Reason for exclusion                                                                                                   |
|-----------------------------------|------------------------------------------------------------------------------------------------------------------------|
| 1. 3063 Urquia                    | Not related to access or navigation of services                                                                        |
| 2. 3069 Janssen                   | Not directly related to maternity care services (violence prevention via obstetrical offices);                         |
| 3. 3071 van Lieshout              | Establishing validity of PPD screening tool for PPD in immigrants but nothing related to experiences in accessing care |
| 4. 3086 Reid                      | Findings presented only relate to research lessons learned rather than experiences/outcomes of immigrant mothers       |
| 5. 3088 Urquia                    | Outcomes not related to accessing or navigating services                                                               |
| 6. 3103 Miszkeuka                 | Nothing related to accessing or navigating services                                                                    |
| 7. 3121 Urquia                    | Nothing related to accessing or navigating services                                                                    |
| 8. 3145 Auger                     | Nothing related to accessing or navigating services                                                                    |
| 9. 3149 Ray                       | Nothing related to accessing or navigating services                                                                    |
| 10. 3159 Moore                    | Nothing related to accessing or navigating services                                                                    |
| 11. 3160 Urquia                   | Nothing related to accessing or navigating services                                                                    |
| 12. 3163 Kulig                    | Not specific to whether immigrants or Cana citizens                                                                    |
| 13. 3166 Small                    | Nothing related to accessing or navigating services                                                                    |
| 14. 3205 Quan                     | Nothing related to accessing or navigating services                                                                    |
| 15. 3211 Urquia                   | Nothing related to accessing or navigating services                                                                    |
| 16. 3321 Campbell                 | Knowledge and beliefs not experiences                                                                                  |
| 17. 3424 Dhari                    | Ethnocultural beliefs and traditions but not related to actual service use or access                                   |
| 18. 3425 Hyman                    | Acculturation, social support and stress – not experiences in services                                                 |
| 19. 3512 Hyman                    | Acculturation and outcomes- no experiences in services                                                                 |

|                          |                                                                                                                                                                                                                                              |
|--------------------------|----------------------------------------------------------------------------------------------------------------------------------------------------------------------------------------------------------------------------------------------|
| 20. 3571 Shah            | Pregnancy outcomes & unrelated to service use/access                                                                                                                                                                                         |
| 21. 3655 Vaudry          | Prevalence of cCMV –nothing related to accessing and navigating                                                                                                                                                                              |
| 22. 3554 Larouche        | Impact of imm on weight gain but not related to use or access to services                                                                                                                                                                    |
| 23. 3657 Fuller-Thompson | Risk factors assessed rather than preg, birth & post outcomes                                                                                                                                                                                |
| 24. 3774 Auger           | Neighborhood & SGA – not service experiences                                                                                                                                                                                                 |
| 25. 3784 Auger           | Birth outcome confounders- Nothing related to accessing or navigating services                                                                                                                                                               |
| 26. 3795 Ray             | Duration vs outcomes - Nothing related to accessing or navigating services                                                                                                                                                                   |
| 27. 3806 heaman          | Immigrants only within aggregated geocoded population SED                                                                                                                                                                                    |
| 28. 3965 Dennis          | Outcomes related to imm women not related to services use or access                                                                                                                                                                          |
| 29. 4112 Bodo            | Qualitative data not presented as empirical research and findings relate to services use were obtained from community members for which none were explicitly described as being immigrant women using health care services during maternity. |
| 30. 4165 Crosse          | Confounders of outcomes- Nothing related to accessing or navigating services                                                                                                                                                                 |
| 31. 4271 Urquia (thesis) | All work unrelated to access and navigation of services                                                                                                                                                                                      |
| 32. 4421 Metchakra       | Prevalence PPD & health status– not related to experiences in services                                                                                                                                                                       |
| 33. 4480 Groleau         | ? sociocultural dimensions of hyperemesis grav unrelated to services use or access                                                                                                                                                           |
| 34. 4602 Zelkowitz       | PPD and risk but none related to experiences with services                                                                                                                                                                                   |
| 35. Brathwaite           | About beliefs and traditions rather than experiences                                                                                                                                                                                         |
| 36. Kurtz                | Outcomes not related to accessing or navigating services                                                                                                                                                                                     |

|                           |                                                                                                                                                                       |
|---------------------------|-----------------------------------------------------------------------------------------------------------------------------------------------------------------------|
| 37. 4643 Edwards          | Ethnocultural variables of infant care behaviours – unrelated to services use or access                                                                               |
| 38. 4735 Redwood Campbell | Data from imm women related to reproductive and other health issues (nonmaternity related) and data on prenatal care issues from sponsor groups not women             |
| 39. 4746 Davey            | One comment in paper about service prediction of PPD (prenatal support not affecting rates of PPD) but not specific to immigrant women and sample only 25% immigrant. |
| 40. 4796 Zelkowitz        | PPD and variables of its continuation but none related to services use/access                                                                                         |
| 41. 4884 Zelkowitz        | Risk factors for PPD but none related to services use/access                                                                                                          |
| 42. 4899 Jimenez          | Prevalence of hyperemesis but unrelated to services experiences                                                                                                       |

**No for Grey Literature:**

|                                         |                                                 |
|-----------------------------------------|-------------------------------------------------|
| 1. 7 –PPP Precarious status             | Not directly related to maternity care services |
| 2. 132 thesis- Quality of Prenatal care | Not directly related to maternity care services |
